# Supplementary material for: Superior virologic and treatment outcomes when viral load is measured at 3 months compared to 6 months on antiretroviral therapy
Source: PubMed Central journal article supplement (PMC4582072; doi:10.7448/ias.18.1.20092), 2015-09-23
Supplement: JIAS-18-20092-s002.pdf [file JIAS-18-20092-s002.pdf]

1 **Additional file 2. Unadjusted and adjusted hazard ratios of treatment switching**  
 2 **(n= 6269).**

3

|                              | Univariate analysis |           |        | Multivariate analysis |           |        |
|------------------------------|---------------------|-----------|--------|-----------------------|-----------|--------|
|                              | cHR*                | 95% CI    | p      | aHR**                 | 95% CI    | p      |
| <b>VL group</b>              |                     |           |        |                       |           |        |
| 6 months                     | 1                   |           | 0.803  | 1                     |           | 0.008  |
| 3 months                     | 1.02                | 0.85-1.23 |        | 0.73                  | 0.58-0.92 |        |
| <b>Sex</b>                   |                     |           |        |                       |           |        |
| Female                       | 1                   |           | 0.006  | 1                     |           | 0.150  |
| Male                         | 0.75                | 0.60-0.92 |        | 0.85                  | 0.67-1.06 |        |
| <b>Age<sup>1</sup></b>       |                     |           |        |                       |           |        |
| 16-24                        | 1                   |           | <0.001 | 1                     |           | <0.001 |
| 25-34                        | 0.49                | 0.39-0.62 |        | 0.48                  | 0.38-0.62 |        |
| 35-44                        | 0.38                | 0.29-0.50 |        | 0.38                  | 0.28-0.51 |        |
| 45-60                        | 0.31                | 0.21-0.48 |        | 0.34                  | 0.22-0.52 |        |
| <b>CD4 count<sup>2</sup></b> | 0.84                | 0.78-0.90 | <0.001 | 0.85                  | 0.79-0.91 | <0.001 |
| <b>WHO stage</b>             |                     |           |        |                       |           |        |
| I + II                       | 1                   |           | 0.004  | 1                     |           | 0.001  |
| III + IV                     | 1.48                | 1.13-1.94 |        | 1.69                  | 1.24-2.29 |        |
| <b>Clinic</b>                |                     |           |        |                       |           |        |
| I                            | 1                   |           | <0.001 | 1                     |           | 0.005  |
| II                           | 0.76                | 0.61-0.94 |        | 0.72                  | 0.57-0.90 |        |
| III                          | 0.48                | 0.38-0.59 |        | 0.46                  | 0.37-0.58 |        |
| <b>Baseline NNRTI</b>        |                     |           |        |                       |           |        |
| Nevirapine                   | 1                   |           | 0.089  | 1                     |           | 0.008  |

|                                   |      |           |       |      |           |       |
|-----------------------------------|------|-----------|-------|------|-----------|-------|
| Efavirenz                         | 0.86 | 0.71-1.02 |       | 0.76 | 0.63-0.93 |       |
| <b>ART initiation<sup>3</sup></b> | 0.97 | 0.96-0.99 | 0.001 | 0.97 | 0.95-0.99 | 0.009 |

4

5 \* cHR, crude hazard ratio

6 \*\* aHR, adjusted hazard ratio

7 \*\*\* PHA, p value for the global proportional-hazards assumption; VIF, range of

8 variance inflation factors

9 <sup>1</sup> The variable age was categorized because the proportional-hazards assumption (PHA)  
10 was violated.

11 <sup>2</sup> per 50 cells/ $\mu$ l

12 <sup>3</sup> Calendar time of ART initiation; per 90 days
